# Supplementary material for: MMP-9 expression varies according to molecular subtypes of breast cancer
Source: PubMed Central journal article supplement (PMC4150970; doi:10.1186/1471-2407-14-609), 2014-08-23
Supplement: 12885_2014_4789_MOESM1_ESM.pdf [file 12885_2014_4789_MOESM1_ESM.pdf]

## Additional file 1

Number of patients with or without metastasis associated with either high or low MMP-9 expression.

|                         | Metastasis | High Expression | Low Expression |
|-------------------------|------------|-----------------|----------------|
| Lymph node<br>(L.N.)    | Yes        | 53              | 12             |
|                         | No         | 68              | 67             |
| Lympho-vascular (L.V.)  | Yes        | 44              | 14             |
|                         | No         | 77              | 65             |
| Blood vessels<br>(B.V.) | Yes        | 10              | 3              |
|                         | No         | 111             | 76             |
| Perineural              | Yes        | 6               | 3              |
|                         | No         | 115             | 76             |
| Skin                    | Yes        | 13              | 7              |
|                         | No         | 108             | 72             |
| Bone                    | Yes        | 14              | 5              |
|                         | No         | 107             | 74             |

|       |     |     |    |
|-------|-----|-----|----|
| Brain | Yes | 6   | 1  |
|       | No  | 115 | 78 |
| Lung  | Yes | 15  | 0  |
|       | No  | 106 | 79 |
| Liver | Yes | 8   | 4  |
|       | No  | 113 | 75 |
